# Supplementary material
Source: MDPI journal article supplement (https://www.mdpi.com/2073-4344/8/3/103)
Supplement: s1 [file s1]

Review

Supplementary Materials:Designing Multifunctionality into Single Phase and Multiphase Metal Oxide Selective Propylene Ammoxidation Catalysts

James F. Brazdil 1

4. Physical Multifunctionality

**Table S1.** Attrition resistance as a function of catalyst composition for a silica supported Ni/Mg/Fe/Rb/Cr/Bi/Ce/Mo/Oxide propylene ammoxidation catalyst1

| **Ce/Fe Ratio** | **Attrition Test Lossess2** |
| --- | --- |
| 0.611 | 12.82 |
| 1.222 | 6.98 |
| 1.944 | 6.35 |
| 1.956 | 6.32 |

1 Brazdil, J. F.; Toft, M. A.; Seely, M. J.; Besescker, C. J.; Gustaferro, R. A.; Attrition Resistant Mixed Metal Oxide Ammoxidation Catalysts. U.S. Patent 8,455,388, 2013.

2 "Attrition Test Losses" is the result of a submerged jet attrition test and the numerical value is the percent loss of catalyst for the period between 0 and 20 hrs. This is a measure of overall catalyst particle strength. Lower attrition numbers are desirable. Attrition numbers above about 8.0 are not preferred for commercial catalysts due to greater catalyst loss rate. The submerged jet is as described in the ASTM standard attrition test.
